# Supplementary material for: Comparative Transcriptome Profiling of Ovary Tissue between Black Muscovy Duck and White Muscovy Duck with High- and Low-Egg Production
Source: MDPI journal article supplement (doi:10.3390/genes12010057), 2020-12-31
Supplement: s1 [file s1]

**Table S1.** Sample quality control information

| Sample | Concentration (ng/ $\mu$ L) | OD260/230 | OD260/280 | RIN |
|--------|-----------------------------|-----------|-----------|-----|
| BH1    | 1,098.3                     | 2.03      | 1.88      | 8.2 |
| BH2    | 1,195.5                     | 2.05      | 1.91      | 9.9 |
| BH3    | 1,143.0                     | 2.08      | 1.96      | 8.8 |
| BL1    | 1,010.1                     | 2.14      | 2.01      | 7.8 |
| BL2    | 1,533.5                     | 2.09      | 2.07      | 8.4 |
| BL3    | 953.9                       | 2.03      | 2.10      | 8.2 |
| WH1    | 1,340.2                     | 2.07      | 1.98      | 8.5 |
| WH2    | 1,215.2                     | 2.10      | 1.88      | 7.9 |
| WH3    | 1,038.6                     | 2.12      | 1.94      | 8.0 |
| WL1    | 875.6                       | 2.10      | 1.97      | 8.6 |
| WL2    | 1,154.1                     | 2.08      | 2.00      | 8.5 |
| WL3    | 1,085.3                     | 2.04      | 1.94      | 8.1 |
